# Supplementary material for: A novel porcine model reproduces human oculocutaneous albinism type II
Source: PubMed Central journal article supplement (PMC6796836; doi:10.1038/s41421-019-0117-7), 2019-10-08
Supplement: 41421_2019_117_MOESM1_ESM.pdf [file 41421_2019_117_MOESM1_ESM.pdf]

1 **Supplementary Information**

2 **Materials and methods**

3 **Pigs**

4 The Bama miniature pigs were raised at the Beijing Farm Animal Research Center (attached to  
5 the Institute of Zoology, Chinese Academy of Sciences) and had ad libitum access to a  
6 commercial pig diet (nutrient levels based on the United States National Research Council  
7 recommendations) and water throughout the experiment. The founder Bama miniature pigs  
8 carrying the S743L mutation were generated in a large-scale ENU mutagenesis screen <sup>1</sup>. All  
9 experiments involving pigs were approved by the Institutional Animal Care and Use Committee  
10 of the Institute of Zoology, Chinese Academy of Sciences, China.

11

12 **GWLS and genotyping**

13 Genomic DNA was isolated from the ear tissues using phenol/chloroform extraction. In total,  
14 nine mutant and twelve wild-type (WT) animals were genotyped using porcine SNP60  
15 BeadChips for the GWLS analysis. Raw data were processed by removing SNPs with a call  
16 rate <90% and a minor allele frequency (MAF) <0.05. Then, Merlin software was used to  
17 perform genome-wide and family-based linkage analysis. In addition, parametric linkage  
18 analysis assuming a recessive model was conducted, and the LOD score was calculated to  
19 assess evidence for linkage.

20 For the candidate gene OCA2, primers were designed to allow amplification of 23 encoding  
21 exons from ear genomic DNA used as templates in 9 affected and 6 WT pigs, and PCR products  
22 were analyzed by Sanger sequencing. Primers are listed in Supplementary Table S2.

23 **qRT-PCR**

24 Total RNA was isolated from tissues using Trizol (Thermo Fisher Scientific Inc., Carlsbad, CA,  
25 USA) and reverse transcribed to cDNA using a FastQuant RT kit (Tiangen Bio Co., Ltd, Beijing,  
26 China). qRT-PCR was performed on a Stratagene Mx3005P real-time PCR system (Agilent  
27 Technologies Inc., Santa Clara, CA, USA) using a SYBR Premix EX Taq kit (Takara Bio Inc.,  
28 Otsu, Shiga, Japan). The relative mRNA expression levels of the target genes were calculated  
29 as the fold changes of the threshold cycle (Ct) value relative to the reference using the  $2^{-\Delta\Delta Ct}$   
30 method. The sequences of the primers used are listed in Supplementary Table S2.

31

32 **Western blot**

33 Tissues were lysed in RIPA lysis buffer (CWPIO Co., Ltd., Beijing, China) and supplemented  
34 with protease inhibitor cocktail (Thermo Fisher Scientific Inc., Rockford, IL, USA). Lysates  
35 were mixed with an equal volume of 2x Laemmli sample buffer (Bio-Rad Laboratories Inc.,  
36 Hercules, CA, USA) and boiled for 5 minutes. The protein extracts were electrophoresed on  
37 12% SDS-PAGE gels and were transferred to PVDF membranes (Bio-Rad Laboratories Inc.,  
38 Hercules, CA, USA). Membranes were blocked with 5% skimmed milk for 2 h at room  
39 temperature and incubated overnight at 4 °C with primary antibodies against OCA2 (Novus  
40 Biologicals, Inc., Littleton, CO, USA, 1:1,000 dilution) and  $\beta$ -actin (Sungene Biotech Co., Ltd,  
41 Tianjin, China, 1:10,000 dilution). The detection was carried out with horseradish peroxidase–  
42 conjugated (HRP) goat anti-rabbit or mouse secondary antibody (Sungene Biotech Co., Ltd,  
43 Tianjin, China, 1:10,000 dilution) and visualized with an enhanced chemoluminescence (ECL)  
44 kit (Thermo Fisher Scientific Inc., Rockford, IL, USA), according to the manufacturer's

45 protocol.

46

#### 47 **Fundus photographs**

48 The pigs were anaesthetized with Zoletil 50 (0.1 mL/kg, Virbac, Carros, France), and pupils  
49 were dilated with tropicamide and phenylephrine hydrochloride (Santen Pharmaceutical Co.,  
50 Ltd., Japan). Fundus photographs were taken with a retinal fundus camera (TRC-NW6S,  
51 Topcon Co., Tokyo, Japan).

52

#### 53 **Histopathology**

54 Tissues were fixed with 4% neutral buffered paraformaldehyde (PFA). The fixed tissues were  
55 embedded in paraffin according to standard laboratory procedures <sup>2</sup>. Five micrometer-thick  
56 sections of paraffin-embedded tissues were processed for H&E staining.

57

#### 58 **Transmission electron microscopy**

59 The porcine eyes were fixed with 2.5% glutaraldehyde in 0.2 M cacodylate buffer overnight.  
60 After washing in 0.2 M PB, the tissue was cut into small pieces, approximately 1 mm<sup>3</sup>, and  
61 immersed in 1% OsO<sub>4</sub> in 0.2 M cacodylate buffer for 2 h at 4 °C. Then, the samples were  
62 dehydrated through a graded ethanol series and embedded in resin. Ultrathin sections were cut  
63 on a Leica EM UC6 ultramicrotome (Leica Microsystems Inc., Wetzlar, Germany), and stained  
64 with uranyl acetate and lead citrate. The morphology of the samples was characterized with  
65 aFEI Tecnai G2 F20 transmission electron microscope (FEI Co., Eindhoven, Netherlands) at  
66 200 kV.

67 **ERGs**

68 Animals were anaesthetized with Zoletil 50 (0.1 mL/kg, Virbac, Carros, France) and pupils  
69 were dilated with tropicamide and phenylephrine hydrochloride (Santen Pharmaceutical Co.,  
70 Ltd., Japan). Before ERGs recordings, dark adaptation was provided for at least 30 min.  
71 Binocular stimulation was used in all ERG recordings. ERGs were recorded with a RETI-Port  
72 32 system (Roland Consult, Wiesbaden, Germany) in accordance with International Society for  
73 Clinical Electrophysiology of Vision standards. Scotopic ERGs were obtained by averaging 3  
74 responses to -25-dB flashes of 0.5 Hz against a dark background of a Ganzfeld screen. The  
75 bandpass filter of the amplifier was set to 1-300 Hz. Photopic ERGs were obtained by  
76 averaging 3 responses to a 0-dB standard flash stimulation of 0.5 Hz with the background light  
77 on. The bandpass filter was set to 1-300 Hz.

78

79 **Measurements of physiological and biochemical parameters**

80 Blood samples were obtained by puncturing the precaval vein of 3-month-old pigs that had  
81 been fasted overnight. The physiological parameters were measured in EDTA-K2-treated blood  
82 using a RAYTO RT-7600S automatic hematology analyzer (Rayto Life and Analytical Sciences  
83 Co., Ltd., Guangzhou, China). Plasma from clot activator-treated blood was separated by  
84 refrigerated centrifugation at 1000 g for 5 minutes and was analyzed using a Hitachi 7080  
85 automatic biochemical analyzer (Hitachi Instrument Inc., Tokyo, Japan) with adapted reagents  
86 (Chemclin Biotech Co., Ltd., Beijing, China).

87

88

89 **Statistical analysis**

90 An unpaired 2-tailed Student's t test (for 2 groups) was applied to parametric data using  
91 GraphPad Prism software (GraphPad Inc., San Diego, CA, USA) or SPSS software (SPSS Inc.,  
92 Chicago, IL, USA). Otherwise, the Mann-Whitney *U* test was applied for nonparametric data.  
93 The results are presented as the means  $\pm$  SD unless otherwise indicated. A *P* value of  $< 0.05$   
94 was considered statistically significant.

95

96 **References**

97

- 98 1 Hai, T. *et al.* Pilot study of large-scale production of mutant pigs by ENU mutagenesis.  
99 *Elife*, 6: e26248, doi:10.7554/eLife.26248 (2017).
- 100 2 Zhang, Y. *et al.* Thyroid hormone regulates hematopoiesis via the TR-KLF9 axis. *Blood*  
101 **130**, 2161-2170, doi:10.1182/blood-2017-05-783043 (2017).

102

103

104

105

106

107

108

109

110

111

112  
113  
114  
115  
116  
117  
118  
119  
120  
121  
122  
123  
124  
125  
126  
127  
128  
129  
130  
131

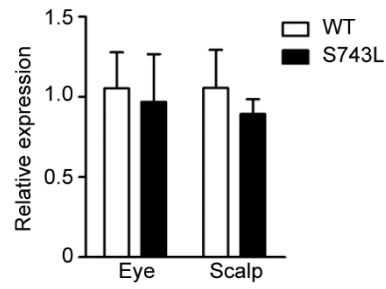

**Supplementary Fig. S1** The S743L mutation does not alter OCA2 expression in eyes and scalp at the transcript level as determined with qRT-PCR (WT: n=6, S743: n=6; P>0.05).

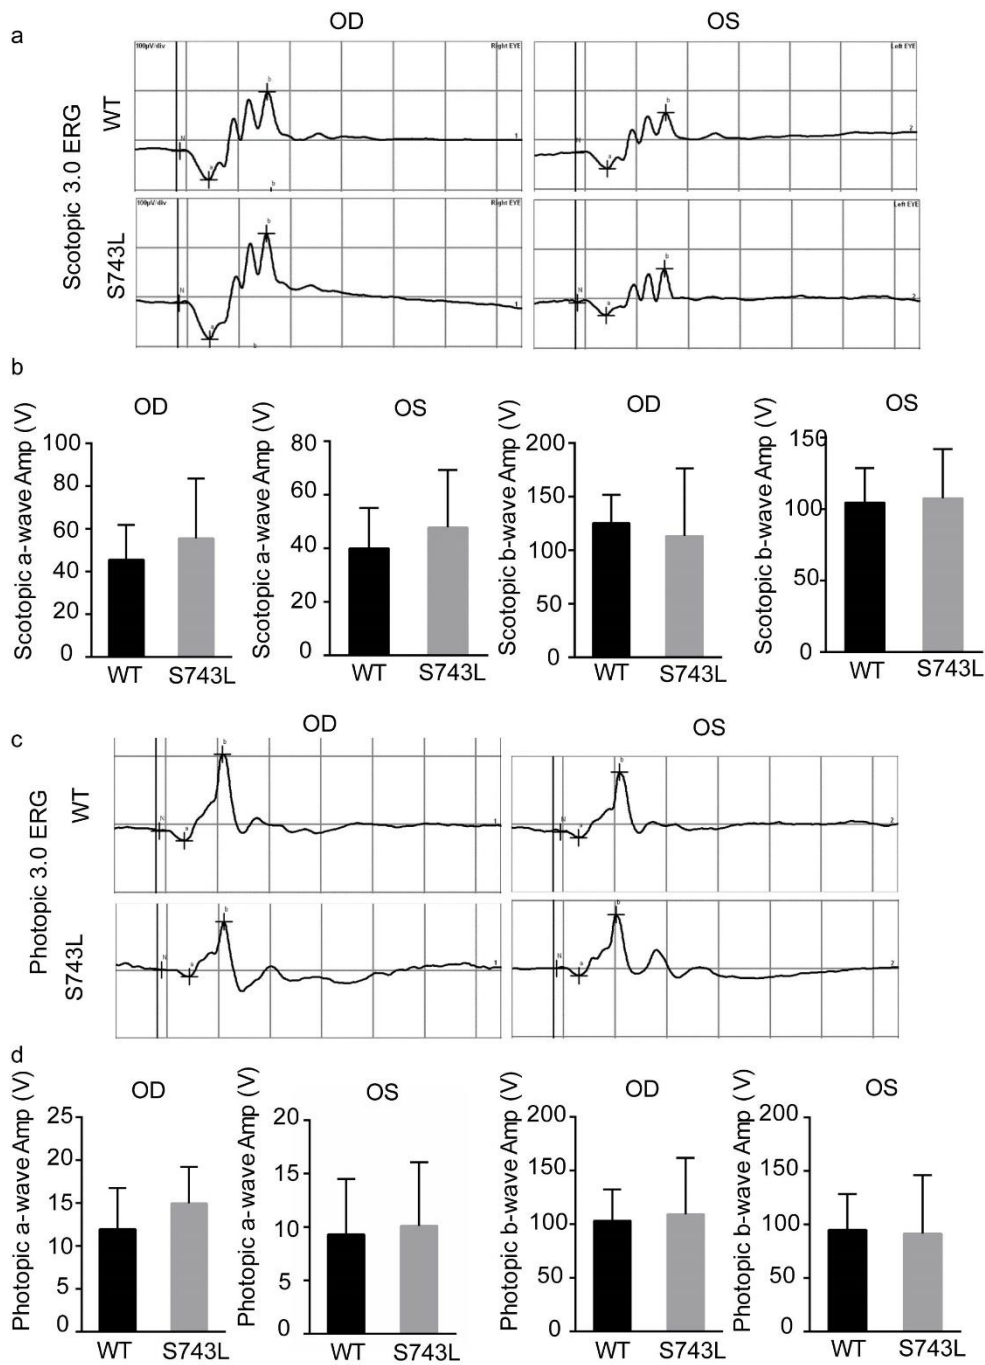

132

133 **Supplementary Fig. S2** Electretinograms (ERGs) were used to assess changes in retinal

134 function. (a-b) No significant differences were found between mutant and WT pigs in scotopic

135 ERGs. (c-d) No significant differences were found between mutant and WT pigs in photopic

136 ERGs. (WT: n=3, S743: n=3; P>0.05).

137

138

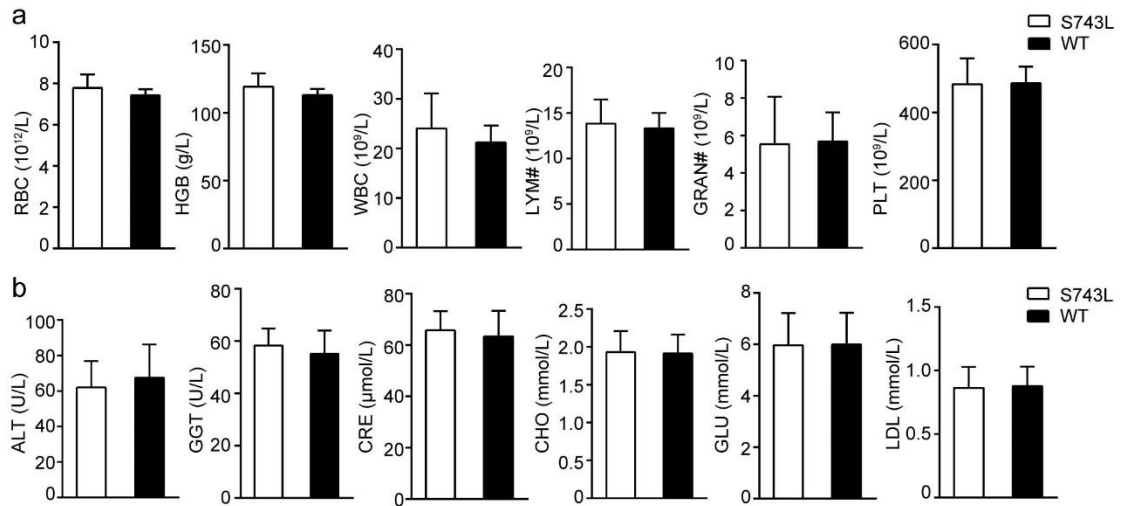

139

140 **Supplementary Fig. S3** (a) At three months, blood physiological parameters of S743L pigs  
 141 showed no significant differences compared with those of WT pigs (WT: n=15, S743: n=11;  
 142  $P > 0.05$ ). (b) At three months, blood biochemical parameters of S743L pigs showed no  
 143 significant differences compared with those of WT pigs (WT: n=15, S743: n=11;  $P > 0.05$ ).

144

145

146

147

148

149

150

151

152

153

154

155



156 **Supplementary Table S1. Genotyping results of the mutant Bama miniature pig line and**  
 157 **various pig breeds.**

| Group                | Phenotype | Number | CC  | CT | TT | C%   | T%   |
|----------------------|-----------|--------|-----|----|----|------|------|
| Z0015                | Mutant    | 14     | 0   | 0  | 14 | 57.7 | 42.3 |
| Pedigree             | WT        | 51     | 24  | 27 | 0  |      |      |
| Additional Pedigrees | WT        | 134    | 134 | 0  | 0  | 100  | 0    |
| Large White          | WT        | 30     | 30  | 0  | 0  | 100  | 0    |
| Landrace             | WT        | 30     | 30  | 0  | 0  | 100  | 0    |

158

159 **Supplementary Table S2. List of primer sequences.**

| Name     | Sequence (5'-3')     | Usage      |
|----------|----------------------|------------|
| OCA2-21F | TGGTTGGCTTGAGTATGG   | Genotyping |
| OCA2-21R | TTCTTTGAAGGAAGGGTG   | Genotyping |
| cOCA2-F  | CGGGACACTGATTGGAGCAT | qRT-PCR    |
| cOCA2-R  | ACCATCATTGGGAAGCCCAG | qRT-PCR    |

160
